# Supplementary material for: Development of a Comprehensive Peri-anesthetic Bundle of Postoperative Delirium Interventions for Thoracic Patients: a Delphi Method Consensus Study
Source: Research Square preprint supplement (doi:10.21203/rs.3.rs-8338925/v1), 2026-02-24
Supplement: Supplementary file 1 [file 41b3acef08da80a64849039b.docx]

**Development of a Comprehensive Peri-anesthetic Bundle of Postoperative Delirium Interventions for Thoracic Patients**

Dear Expert,

Thank you very much for participating in the second round of expert consultation for the ‘Development of a Comprehensive Peri-anesthetic Bundle of Postoperative Delirium Interventions for Thoracic Patients’.

This study aims to establish a feasible, scalable intervention strategy to reduce postoperative delirium in patients undergoing thoracic surgery. The following sections outline the results of the first and the second consultation questionnaires. In these questionnaires, you were assigned scores to each item based on its perceived importance, ranging from 0 to 100.

**Results of the first-round consultation**

In the first round of expert consultation, we categorized intervention strategy items according to guidelines, consensus, and relevant literature, organizing them into nine primary categories. Table 1 below presents the first-round results. The first round included 9 primary items, 32 secondary items, 47 tertiary items, and 15 quaternary items. After consolidating the specialists' feedback, we removed entries that had an average importance index below 3.24 (on a scale of 1 to 5, as assessed by the experts in the first questionnaire). Consequently, we excluded 2 secondary items, 15 tertiary items, and 8 quaternary items, with an overall median. Currently, there are 9 primary entries, along with 30 secondary entries, 32 tertiary entries, and 7 quaternary entries.

Requirements for clarification:

1. In the section titled "I. Assessment of Perioperative Neurocognitive Function," we focus on two areas: Cognitive Function Assessment and Assessment of Postoperative Delirium. None of the key indices for the recommended scales exceeded the mean. However, given the project's essential role in assessing cognitive function, the project group, after discussion, decided to select scales based on their clinical feasibility. The project group chose the Mini-Cog scale for the initial assessment. If the Mini-Cog score is below 2 points, the team will use the Montreal Cognitive Assessment (MoCA) scale for a follow-up evaluation. To assess postoperative delirium, the project group chose the straightforward 3D-CAM scale of initial assessment. The CAM-ICU scale was then utilized during anesthetic recovery.

2. Given that the entry ‘I. Assessment of Perioperative Neurocognitive Function’ under ‘Management of Postoperative Delirium’ retains only ‘2. Pharmacological Management: Dexmedetomidine; seek assistance from a specialist psychiatrist. In the 'Pharmacological Management’ section, the project team proposes adding emergency management for postoperative delirium, as detailed in Table 1.

3. The entry “Intraoperative Pain Management, 2. Supplementary Use of Regional Anaesthesia” has a critical index of 3.16, which is below the overall median. As a result, this entry should be excluded. However, since regional anaesthesia techniques reduce opioid consumption and improve postoperative pain control, the project team has decided to retain '2. Supplementary Use of Regional Anaesthesia.'

4. In section II. Perioperative Pain Management: Remedial Analgesic Measures, the critical index for analgesic drugs did not exceed the median value. As a result, the project team decided to use tailored analgesics for each patient. Following expert recommendations, the suggested supplementary analgesic options include opioid drugs and non-steroidal anti-inflammatory drugs.

5. In Section IV, Perioperative Sleep-Emotional Management, specifically “Sleep Assessment and Sleep Disorder Intervention”, under “Sleep Assessment”, given the divergence of expert opinions. Given the link between sleep quality and postoperative delirium, the project team decided to retain the sleep assessment and use a numerical rating scale. Additionally, since experts did not recommend any specific pharmacological treatments for sleep disorders, the team suggested that interventions be tailored to the particular clinical situation. Consulting a neurologist should be considered whenever necessary.

6. Entries ‘ Assessment of Perioperative Neurocognitive Function: Perioperative Cognitive Exercise Training; Treatment of Postoperative Delirium: 1. Non-pharmacological Management, V. Nutritional Status Assessment and Nutritional Support, VI. Anaesthetic Recovery Period’, VII. Intensive Care Unit Intervention Strategy, "VIII. Ward Intervention Strategy: Based on the HELP Protocol, and IX. Enhanced Recovery-Associated Strategies remain preserved, though not detailed in Table 1.

Table 1 The results of the first round.

| **I Perioperative neurocognitive function assessment and cognitive function exercise** | |
| --- | --- |
| **Cognitive function assessment**: The Mini-Cog scale was used for the initial assessment. If the scale score was less than 2 points, the Montreal Cognitive Assessment scale was used for the re-assessment | |
| **Evaluation of postoperative delirium** | |
| 3D-CAM: Before and after surgery 1-7 days or 1 day after surgery to before discharge | |
| CAM-ICU Scale: Upon awakening from anesthesia | |
| **Perioperative cognitive function exercise** (retained in full, not elaborated upon) | |
| **Postoperative delirium treatment** | |
| 1. Non-pharmacological therapy (retained in full, not elaborated upon) | |
| (1) Remove risk factors | |
| (2) Change the environment and behavioral support | |
| 2. Pharmacological treatment: Dexmedetomidine; a psychiatrist for help. | |
| 3. Emergency measures: Administer haloperidol 0.5-2mg, Oral, muscular, or intravenous administration to control delirium symptoms is recommended for agitated delirium and can be repeated every 15-20 minutes until symptoms are controlled. | |
| **II Perioperative pain management with multi-modal analgesia** | |
| **Intraoperative pain management** | |
| 1. Opioid-based continuous analgesia. | |
| 2. Regional anesthesia technique: Paravertebral block is recommended. | |
| **Postoperative pain management** | |
| 1. Patient-controlled intravenous analgesia | In all postoperative analgesia programs, two or more are recommended |
| 2. Regional anesthesia technique: Paravertebral block is recommended. |
| 3. Non-steroidal anti-inflammatory drugs were used three days after surgery |
| **Pain assessment** | |
| 1. Numerical Rating Scale (NRS): Intervention is performed if NRS is greater than 4 points. | |
| Remedial analgesia: Additional analgesic medication administered by the anaesthetist based on pain scores (medication selected individually according to the patient's condition). | |
| 1. Avoid using pethidine. | |
| 2. Recommended complementary drugs of choice: opioids, non-steroidal drugs | |
| **III Intraoperative Anaesthesia Management** | |
| **Anesthesia mode selection:** intravenous inhalational anesthesia | |
| **adjuvant drug** | |
| 1. Avoid benzodiazepines. | |
| 2. Avoid anticholinergic drugs. | |
| 3. Use dexmedetomidine | |
| **Anaesthesia Management** | |
| 1. Minimize anesthesia operation time | |
| 2. The depth of anesthesia was monitored and regulated: Bispectral Index (BIS) | |
| 3. Maintain blood pressure fluctuation within baseline ±20%. PICCO monitoring is recommended. | |
| 4. Strictly adhere to transfusion indications, maintaining haemoglobin levels above 100 g/L wherever possible. | |
| 5. Lung protective ventilation strategy (small tidal volumes, positive end-expiratory pressure, and lung recruitment manoeuvres) | |
| (1) Avoid hyperventilation (maintain end-expiratory CO2 at 35-45 mmHg) | |
| (2) Monitor PaCO2 (by performing blood gas analysis) to avoid CO2 retention. | |
| (3) Perioperative hypoxemia should be avoided (maintain SpO2, not less than 90%). | |
| (4) Adequate sputum aspiration and lung expansion should be performed before the end of the operation and during the anesthesia recovery period. | |
| 6. Temperature protection：Try to maintain body temperature not lower than 36 Degree Celsius (use inflatable thermal blanket). | |
| 7. Maintain water, electrolyte, and acid-base balance | |
| **IV. Perioperative Sleep-Emotional Management** | |
| **Psychological Assessment and Emotional Management** | |
| 1. Huaxi heart sunny index questionnaire was used before and after operation. | |
| 2. If the score is greater than 16, a professional mental health center physician will intervene. | |
| 3. Good preoperative communication. | |
| 4. Kinship escort. | |
| **Sleep Assessment and Sleep Disorder Intervention** | |
| 1. Sleep assessment: A designated researcher conducted assessments using a numerical scoring system both preoperatively and 1–3 days postoperatively. | |
| (1) Non-pharmaceutical intervention: Principles of psychological behavior intervention. | |
| (2) Pharmaceutical intervention: physician-assisted | |
| **V. Nutritional status assessment and support** (Retained in full, without elaboration) | |
| **VI. Anesthesia recovery period management** (Retained in full, without elaboration) | |
| **VII. Intensive care unit interventions** (Retained in full, without elaboration) | |
| **VIII.** **Ward interventions: Based on the HELP Programme** (Retained in full, without elaboration) | |
| **IX. Interventions for enhanced recovery after surgery** (Retained in full, without elaboration) | |

**The second-round questionnaire**

**Notes on the Second Round of Expert Consultation:**

1. The existing research has shown the effectiveness of intervention strategies in both intensive care units and regular wards. Therefore, the proposed validation trial in the later phase of this project will focus specifically on aspects of anaesthetic management. Additionally, it will assess perioperative cognitive function, pain management during the perioperative period, and strategies for the anaesthetic recovery phase. To evaluate the feasibility and scalability of clinical implementation, the second round of expert consultations suggests assigning weightings (ranging from 0 to 100 points) to the following areas: “I. Perioperative Cognitive Function Assessment, II. Perioperative Pain Assessment,” III.. Intraoperative Anesthetic Management, and IV. Anesthetic Recovery Period.” This scoring system aims to identify both universal strategies (applicable to all patients) and individualized strategies (tailored based on surgical type, comorbidities, and risk factors) within these categories.

2. In the section titled 'III. Intraoperative Anaesthetic Management, (3) Anaesthetic Management, 4. Strictly adhere to transfusion indications; maintain hemoglobin levels above 100 g/L whenever possible. The definitions for both strict and liberal transfusion strategies are not provided. During this round of expert consultation, please choose one strategy to recommend and assign a weighting score to this entry. In entry “3. Maintain blood pressure fluctuations within ±20% of baseline (preoperative).” Please evaluate the recommendation for adding ‘PICCO monitoring.’ Consider whether this is advisable and assign a weighting score to this entry. In entry “5. Employ lung-protective ventilation strategies.“ Please add the following item: (4) Routinely perform thorough suctioning and lung expansion before concluding surgery and during the anesthetic recovery period. Please advise whether this addition is recommended and assign a weighting score for this item.

| **Development of a Comprehensive Peri-anesthetic Bundle of Postoperative Delirium Interventions for Thoracic Patients** | | |
| --- | --- | --- |
| **Importance rating** | | **0-100 points** |
| **I Perioperative neurocognitive function assessment and cognitive function exercise** | | |
| **Cognitive function assessment**: The Mini-Cog scale was used for the initial assessment. If the scale score was less than 2 points, the Montreal Cognitive Assessment scale was used for the re-assessment | |  |
| **Evaluation of postoperative delirium** | | |
| 3D-CAM: Before and after surgery 1-7 days or 1 day after surgery to before discharge | |  |
| CAM-ICU Scale: Upon awakening from anesthesia | |  |
| **Perioperative cognitive function exercise** | |  |
| 1. Enhancing cognitive function: Engaging in conversation with patients, encouraging them to read books, newspapers, or listen to the radio, etc. | |  |
| 2. Assisting with orientation recovery: Inform the patient of their location, the time, and their current condition; provide a clock, calendar, etc. | |  |
| 3. For patients with visual impairment: | |  |
| Use visual aids when fully conscious | |  |
| Approach the patient from the side with better visibility. | |  |
| 4. For individuals with hearing impairment | |  |
| Use hearing aids when awake | |  |
| Wear your hearing aids and ensure they are functioning correctly. | |  |
| Speak clearly and minimise background noise. | |  |
| 5. Encourage patients to engage in cognitive-enhancing activities: attention training, working memory exercises, and habit-correction training. | |  |
| **Importance rating** | | **0-100 points** |
| **Postoperative delirium treatment** | |  |
| 1. Non-pharmacological therapy | |  |
| (1) Remove risk factors | |  |
| For hypoxaemia: Promptly identify and assess hypoxaemia; monitor the patient's blood oxygen concentration, maintaining oxygen saturation above 90%. | |  |
| For infections: Promptly identify and treat infections; avoid unnecessary intubation (e.g., urinary catheterisation); strictly implement hospital infection control measures. | |  |
| For polypharmacy: Assess medications with the involvement of clinical pharmacists; Reduce the number of medications prescribed to patients; Avoid medications that exacerbate delirium symptoms. | |  |
| Comprehensive preventive measures should be implemented to address patient risk factors. | |  |
| (2) Change the environment and behavioral support | |  |
| Patients exhibiting hazardous behaviour may be subject to appropriate behavioural restrictions or physical restraints. Timely assessment of cognitive function should be conducted, with restraints removed as soon as medically feasible. | |  |
| **Importance rating** | | **0-100 points** |
| Whenever possible, facilitate the patient's return to a familiar environment: introduce them to the surroundings and staff, provide care by familiar nursing personnel or family members, and encourage visits from the patient's relatives and friends. | |  |
| Provide a well-lit environment with a large digital clock and a wall calendar | |  |
| Music therapy, massage | |  |
| Fostering wakefulness and activity to encourage a normal sleep-wake cycle | |  |
| 2. Pharmacological treatment | |  |
| Dexmedetomidine | |  |
| A psychiatrist for help. | |  |
| 3. Emergency measures: Administer haloperidol 0.5-2mg, Oral, muscular, or intravenous administration to control delirium symptoms is recommended for agitated delirium and can be repeated every 15-20 minutes until symptoms are controlled. | |  |
| **Importance rating** | | **0-100 points** |
| **II Perioperative pain management with multi-modal analgesia** | | |
| **Intraoperative pain management** | |  |
| 1. Opioid-based continuous analgesia. | |  |
| 2. Regional anesthesia technique: Paravertebral block is recommended. | |  |
| **Postoperative pain management** | | |
| 1. Patient-controlled intravenous analgesia | |  |
| 2. Regional anesthesia technique: Paravertebral block is recommended. | |  |
| 3. Non-steroidal anti-inflammatory drugs were used three days after surgery | |  |
| In all postoperative analgesia programs, two or more are recommended | |  |
| **Pain assessment** | |  |
| 1. Numerical Rating Scale (NRS): Intervention is performed if NRS is greater than 4 points. | |  |
| **Remedial analgesia**: Additional analgesic medication administered by the anaesthetist based on pain scores (medication selected individually according to the patient's condition). | |  |
| 1. Avoid using pethidine. | |  |
| 2. Recommended complementary drugs of choice: opioids, non-steroidal drugs | |  |
| **Importance rating** | | **0-100 points** |
| **III Intraoperative Anaesthesia Management** | | |
| **Anesthesia mode selection:** intravenous inhalational anesthesia | |  |
| **adjuvant drug** | |  |
| 1. Avoid benzodiazepines. | |  |
| 2. Avoid anticholinergic drugs. | |  |
| 3. Use dexmedetomidine | |  |
| Continuous infusion of dexmedetomidine 0.5–1.0 μg/kg administered 10–15 minutes prior to anaesthetic induction. | |  |
| During the maintenance phase of general anaesthesia, continuous infusion of dexmedetomidine at a rate of 0.2 to 0.7 μg·kg⁻¹·h⁻¹ may be administered. | |  |
| Administering rocuronium should be discontinued at least 30 minutes to 1 hour before the conclusion of surgery. | |  |
| **Importance rating** | | **0-100 points** |
| **Anaesthesia Management** | |  |
| 1. Minimize anesthesia operation time | |  |
| 2. The depth of anesthesia was monitored and regulated: Bispectral Index (BIS) | |  |
| 3. Maintain blood pressure fluctuation within baseline ±20%. PICCO monitoring is recommended. | Would you recommend it? |  |
| 4. Transfusion strategy: Please select one of the recommended options. | Would you recommend it? | **0-100 points** |
| Strict transfusion strategy |  |  |
| Moderately easy transfusion indication |  |  |
| 5. lung protective ventilation strategy (small tidal volumes, positive end-expiratory pressure, and lung recruitment manoeuvres) | |  |
| (1) Avoid hyperventilation (maintain end-expiratory CO2 at 35-45 mmHg) | |  |
| (2) Monitor PaCO2 (by performing blood gas analysis) to avoid CO2 retention. | |  |
| (3) Perioperative hypoxemia should be avoided (maintain SpO2, not less than 90%). | |  |
| (4) Adequate sputum aspiration and lung expansion should be performed before the end of the operation and during the anesthesia recovery period. | Would you recommend it? |  |
| 6. Temperature protection：Try to maintain body temperature not lower than 36 Degree Celsius (use inflatable thermal blanket). | |  |
| 7. Maintain water, electrolyte, and acid-base balance | |  |
| **Importance rating** | | **0-100 points** |
| **VI. Anesthesia recovery period management** | | |
| (1) Early removal of tracheal catheter | |  |
| (2) Timely pain assessment and management | |  |
| (3) Helps to restore orientation: Cognitive exercise began during the recovery period from anesthesia | |  |
