# Supplementary material for: Development of a Comprehensive Peri-anesthetic Bundle of Postoperative Delirium Interventions for Thoracic Patients: a Delphi Method Consensus Study
Source: Research Square preprint supplement (doi:10.21203/rs.3.rs-8338925/v1), 2026-02-24
Supplement: Supplementary file 2 [file 662b30c535c9599d06d267c8.docx]

Supplement Table 1 The important index of the primary items and the secondary items in the first round.

| primary items | secondary items | third-level items | Average |
| --- | --- | --- | --- |
| Perioperative neurocognitive function assessment and cognitive function exercise | Cognitive function assessment | pre-operation: MMSE | 2.50* |
| 7 days after surgery: MMSE | 2.50* |
| 1 month after surgery: TICS-M | 3.00* |
| 3 months after surgery: TICS-M | 3.00* |
| Evaluation of postoperative delirium | pre-operation: 3D-CAM | 2.50* |
| 1-7 days after surgery or before discharge: CAM | 3.00* |
| Resuscitation under anesthesia: CAM-ICU | 4.26 |
| Perioperative cognitive function exercise | Improve cognitive function | 4.16 |
| Helps to restore orientation | 4.16 |
| assistance to visually impaired patients | 3.67 |
| Appropriate assistance to hearing-impaired patients | 3.83 |
| Educational activity | 4.00 |
| Postoperative delirium treatment | Pharmaceutical therapy: Dexmedetomidine | 5.00 |
| Non-pharmaceutical therapy | 4.15 |
| Perioperative pain management with multi-modal analgesia  Perioperative pain management with multi-modal analgesia | Preoperative pain management | Use analgesics based on pain score | 2.83* |
| Regional anesthesia technique | 3.33 |
| Intraoperative pain management | Opioid analgesia is used primarily | 3.33 |
| Applied regional anesthesia | 3.16* |
| Postoperative pain management | Patient-controlled intravenous analgesia | 4.67 |
| Regional anesthesia technique | 4.17 |
| Non-steroidal anti-inflammatory drugs were used three days after surgery | 3.67 |
| Pain assessment | numerical rating scale | 3.33 |
| visual analogue scale | 1.66* |
| Remedial analgesia | Avoid using pethidine | 3.34 |
| Intraoperative anesthesia management | Anesthesia mode selection | intravenous anesthesia | 2.00* |
| Inhalation anesthesia | 2.83* |
| intravenous inhalational anesthesia | 4.00 |
| Adjuvant drug | Avoid benzodiazepines | 4.00 |
| Avoid anticholinergic drugs | 3.33 |
| Use dexmedetomidine | 5.00 |
| Use ulinastatin | 2.50* |
| Use glucocorticoids | 2.50* |
| Anesthesia management | Minimize anesthesia operation time | 5.00 |
| The depth of anesthesia was monitored and regulated | 4.83 |
| Maintain blood pressure fluctuation within baseline ±20% | 5.00 |
| Strictly grasp the indications for blood transfusion, and the hemoglobin level should be maintained above 100 g/L as far as possible | 4.83 |
| lung protective ventilation strategy | 3.67 |
| Temperature protection | 4.16 |
| maintain water, electrolyte and acid-base balance, | 4.16 |
| Perioperative Sleep -Mood management | Psychological assessment and emotion management | Huaxi heart sunny index questionnaire was used before and after operation | 4.50 |
| If the score is greater than 16, a professional mental health center physician will intervene | 4.00 |
| Good preoperative communication | 4.00 |
| Kinship escort | 4.00 |
| Sleep quality assessment | numerical rating scale | 2.50* |
| Pittsburgh sleep score | 2.50* |
| Sleep disorder intervention | Non-pharmaceutical intervention: Principles of psychological behavior intervention | 3.83 |
| Pharmaceutical intervention: physician-assisted | 3.16* |
| Nutritional status assessment and support | Nutritional assessment | Applied Nutrition risk screening 2002 | 4.17 |
| Nutritional support | Patients who were at risk of malnutrition or had suffered from preoperative malnutrition (NRS2002≥3 points) were adjusted to improve their nutritional status before surgery | 4.17 |
| After the postoperative evaluation, if the NRS2002 score is ≥3, nutritional support should be provided, such as enteral nutrition support. If necessary, the nutrition department should provide professional nutritional support. | 4.17 |
| Anesthesia recovery period management | Early removal of tracheal catheter | | 4.17 |
| Timely pain assessment and management | | 4.17 |
| Helps to restore orientation: Cognitive exercise began during the recovery period from anesthesia | | 3.67 |
| Intensive care unit interventions | Active treatment of primary disease | | 4.50 |
| Improve ICU environment and patient comfort  By day and night light adjustment, reduce the noise in the ward, maintain a comfortable temperature | | 4.33 |
| Apply dexmedetomidine | | 4.33 |
| ABCDE strategy: Daily Awake, Breathing trial, Choice of appropriate sedative and analgesic medications, Delirium monitoring, and Early mobilization and mobilization Exercise | | 4.33 |  |
| Ward interventions | Early activity | | 4.67 |
| Enhancing sensory stimulation | | 4.50 |
| Improve fluid and nutrient intake | | 4.33 |
| Improve sleep | | 4.67 |
| Cognitive training | | 4.50 |
| Strengthen communication and enhance a sense of security | | 4.33 |
| Interventions for enhanced recovery after surgery | Early mobilization and Exercise | | 3.83 |
| Early removal of the tube (drainage tube, urinary tube, etc.) | | 4.00 |
| Intestinal function recovery | | 3.83 |

* The average of the items did not exceed 3.24.

MMSE, Mini-Mental State Examination; TICS-M, the Modified Telephone Interview for Cognitive Status; 3D-CAM,3-minute diagnostic confusion assessment method; CAM, confusion assessment method; CAM-ICU, the confusion assessment method for the Intensive Care Unit; NRS2002, Nutrition Risk Screening 2002; ICU, Intensive Care Unit
