# Supplementary material for: Development of a Comprehensive Peri-anesthetic Bundle of Postoperative Delirium Interventions for Thoracic Patients: a Delphi Method Consensus Study
Source: Research Square preprint supplement (doi:10.21203/rs.3.rs-8338925/v1), 2026-02-24
Supplement: Supplementary file 3 [file e22904a6c1b96094d71f6caf.docx]

Supplement Table 2 Results of the second round of expert consultation.

| primary items | secondary items | third-level items | fourth-level items | Average |
| --- | --- | --- | --- | --- |
| **Perioperative neurocognitive function assessment and cognitive function exercise** | Cognitive function assessment | The Mini-cog scale was used for the initial assessment. If the scale score was less than 2 points, the Montreal Cognitive Assessment scale was used for the re-assessment | | 78.50 |
| Evaluation of postoperative delirium | 3D-CAM: Before and after surgery 1-7 days or 1 day after surgery to before discharge | | 82.50 |
| CAM-ICU: Upon awakening from anesthesia | | 80.00 |
| Perioperative cognitive function exercise | Improve cognitive function | | 81.00 |
| Helps to restore orientation | | 77.80 |
| assistance to visually impaired patients | | 74.50* |
| Appropriate assistance to hearing-impaired patients | | 78.00 |
| Educational activity | | 79.00 |
| Postoperative delirium treatment | Pharmaceutical therapy | Dexmedetomidine | 82.00 |
| a psychiatrist for help | 69.70* |
| Non-pharmaceutical therapy | Removal of risk factors | 76.43 |
| Change the environment and behavioral support | 71.11* |
| Emergency measures: Administer haloperidol 0.5-2mg, Oral, muscular, or intravenous administration to control delirium symptoms is recommended for agitated delirium and can be repeated every 15-20 minutes until symptoms are controlled. | | 71.50* |
| **Perioperative pain management with multi-modal analgesia** | Intraoperative pain management | Opioid-based continuous analgesia | | 70.80* |
| Regional anesthesia technique | | 70.80* |
| Postoperative pain management | Patient-controlled intravenous analgesia | | 71.80* |
| Regional anesthesia technique | | 76.80 |
| Non-steroidal anti-inflammatory drugs were used three days after surgery | | 79.00 |
| In all postoperative analgesia programs, two or more are recommended | | 58.10* |
| Pain assessment | NRS: Intervention is performed if NRS is greater than 4 points | | 86.00 |
| Remedial analgesia | Avoid using pethidine | | 68.30* |
| Recommended complementary drugs of choice: opioids, non-steroidal drugs | | 46.10* |
| **Intraoperative anesthesia management**  **Intraoperative anesthesia management** | Anesthesia mode selection：intravenous inhalational anesthesia | | | 81.30 |
| Adjuvant drug | Avoid benzodiazepines | | 65.10* |
| Avoid anticholinergic drugs | | 69.10* |
| Use dexmedetomidine | | 73.50* |
| Anesthesia management  Anesthesia management | Minimize anesthesia operation time | | 61.10* |
| The depth of anesthesia was monitored and regulated | | 65.60* |
| Maintain blood pressure fluctuation within baseline ±20%. PICCO monitoring is recommended | | 33.00* |
| blood transfusion | Strict transfusion indication | 44.4* |
| Moderately easy transfusion indication | Remove |
| lung protective ventilation strategy | Avoid hyperventilation (maintain end-expiratory CO2 at 35-45 mmHg) | 80.30 |
| Monitor PaCO2 (by performing blood gas analysis) to avoid CO2 retention | 74.30* |
| Perioperative hypoxemia should be avoided (maintain SpO2, not less than 90%) | 84.30 |
| Adequate sputum aspiration and lung expansion should be performed before the end of the operation and during the anesthesia recovery period | 70.30* |
| Temperature protection：Try to maintain body temperature not lower than 36 Degree Celsius (use inflatable thermal blanket) | | 77.50 |
| maintain water, electrolyte and acid-base balance | | 71.50* |
| **Anesthesia recovery period management** | Early removal of tracheal catheter | | | 75.80 |
| Timely pain assessment and management | | | 84.80 |
| Helps to restore orientation: Cognitive exercise began during the recovery period from anesthesia | | | 69.80* |

* The average of the protocol did not exceed 74.55.

3D-CAM,3-minute diagnostic confusion assessment method; CAM-ICU, the confusion assessment method for the Intensive Care Unit; NRS, numerical rating scale; PICCO, Pulse Indicator Continuous Cardiac Output
