# Supplementary material for: Development of a Comprehensive Peri-anesthetic Bundle of Postoperative Delirium Interventions for Thoracic Patients: a Delphi Method Consensus Study
Source: Research Square preprint supplement (doi:10.21203/rs.3.rs-8338925/v1), 2026-02-24
Supplement: Supplementary file 4 [file f7df147d7d4456c33a8537dc.docx]

**Development of a Comprehensive Peri-anesthetic Bundle of Postoperative Delirium Interventions for Thoracic Patients**

Dear experts:

Hello! We sincerely invite you to participate in an expert consultation on developing perioperative intervention strategies to prevent postoperative delirium in thoracic surgery patients. Thank you for taking the time to fill out this questionnaire.

Postoperative delirium (POD) is delirium that occurs within 7 days after surgery or before discharge. According to the World Health Organization's International Classification of Diseases (ICD-10), POD is characterized by an acute onset after surgery, impaired concentration, changes in consciousness, and cognitive impairment. It seriously affects patients' prognosis. According to the relevant literature, the incidence of POD ranges from 11% to 50% [1], and in thoracic surgery, it can reach 42% [2]. However, there are few studies on postoperative delirium in thoracic patients at present, and most are small-sample randomized controlled trials exploring whether dexmedetomidine[3], low-dose haloperidol, and improved analgesia methods can prevent POD. Relevant studies are mostly single-factor studies, lacking comprehensive perioperative management strategies for the prevention and treatment of POD.

Therefore, our research group plans to carry out the project, " Development of a Comprehensive Peri-anesthetic Bundle of Postoperative Delirium Interventions for Thoracic Patients,” which is funded by the National Clinical Research Center for Geriatric Diseases (West China Hospital of Sichuan University). The purpose of this project is to establish a "Perioperative Intervention Strategy for Postoperative Delirium in Patients with Thoracic Surgery" that is easy to implement and widely adopted clinically, and to verify whether implementing this intervention strategy reduces the incidence of POD in patients with Thoracic Surgery through a randomized controlled study.

Steps in the intervention strategy generation: First, the intervention strategy's implementation time is preliminarily planned as preoperative, intraoperative, and postoperative. Based on guidelines, expert consensus, and relevant references, the initial intervention strategy is developed. To ensure the scientificity, rationality, and completeness of the intervention strategy, we use the Delphi method to gather expert opinions and suggestions.

According to the Delphi method, this expert consultation will be conducted over 3-4 rounds, resulting in a more consistent intervention strategy. Thank you again!

Department of Anesthesiology, West China Hospital, Sichuan University

December 2019

**Catalogue：**

[I Perioperative neurocognitive function assessment and cognitive function exercise 5](#_Toc219893288)

[Cognitive function assessment: Please select and recommend a scale for the four time points 5](#_Toc219893289)

[Evaluation of postoperative delirium 5](#_Toc219893290)

[Perioperative cognitive function exercise 6](#_Toc219893291)

[Postoperative delirium treatment 7](#_Toc219893292)

[II Perioperative pain management with multi-modal analgesia 9](#_Toc219893293)

[Preoperative Pain Management 9](#_Toc219893294)

[Intraoperative pain management 9](#_Toc219893295)

[Postoperative pain management 10](#_Toc219893296)

[Pain assessment 11](#_Toc219893297)

[III Intraoperative Anaesthesia Management 11](#_Toc219893298)

[Anesthesia mode selection 11](#_Toc219893299)

[adjuvant drug 12](#_Toc219893300)

[Anaesthesia Management 12](#_Toc219893301)

[IV Sleep Assessment and Sleep Disorder Intervention 14](#_Toc219893302)

[Psychological assessment and emotion management 14](#_Toc219893303)

[Sleep quality assessment and Sleep-disorder intervention 14](#_Toc219893304)

[V. Nutritional status assessment and support 16](#_Toc219893305)

[Nutritional assessment 16](#_Toc219893306)

[Nutritional support 16](#_Toc219893307)

[VI. Anesthesia recovery period management 17](#_Toc219893308)

[Early removal of tracheal catheter 17](#_Toc219893309)

[Timely pain assessment and management 17](#_Toc219893310)

[Helps to restore orientation: Cognitive exercise began during the recovery period from anesthesia 17](#_Toc219893311)

[VII. Intensive care unit interventions 17](#_Toc219893312)

[Active treatment of primary disease 17](#_Toc219893313)

[Improve ICU environment and patient comfort 17](#_Toc219893314)

[Apply dexmedetomidine 17](#_Toc219893315)

[ABCDE strategy 18](#_Toc219893316)

[VIII. Ward interventions 18](#_Toc219893317)

[Early activities 18](#_Toc219893318)

[Enhancing sensory stimulation 18](#_Toc219893319)

[Improve fluid and nutrient intake 18](#_Toc219893320)

[Improving sleep 18](#_Toc219893321)

[Cognitive training: 18](#_Toc219893322)

[Strengthen communication to enhance a sense of security 19](#_Toc219893323)

[IX Interventions for enhanced recovery after surgery 19](#_Toc219893324)

[Early mobilisation 19](#_Toc219893325)

[Early removal of tubes 19](#_Toc219893326)

[Restoration of intestinal function 19](#_Toc219893327)

**Instructions for completing the questionnaire**

1. Please evaluate in the "whether to recommend retention", fill in yes/uncertain/no, and fill in the importance index, ranging from 1 to 5 points; the higher the score, the more critical it is.

2. Please comment on "whether to suggest modification/addition" and fill in yes/no; if yes, please write down specific modification or addition opinions.

3. If it is suggested to add a primary item (items No. I, II, and III), please fill in at the end of the questionnaire. If it is suggested to add a secondary item (Bolded subtitle), a third-level item (item No. 1, 2, and 3), and a fourth-level item (item No. (1), (2), and (3)), please fill in at the end of the corresponding item.

4. Abbreviations: MMSE, Mini-Mental State Examination; TICS-M, the Modified Telephone Interview for Cognitive Status; 3D-CAM,3-minute diagnostic confusion assessment method; CAM, confusion assessment method; CAM-ICU, the confusion assessment method for the Intensive Care Unit; NRS2002, Nutrition Risk Screening 2002; ICU, Intensive Care Unit

| **Intervention strategy** | **Recommended to retain** | **Importance index (1-5)** | **Suggest modification/addition** | **Specific changes** |
| --- | --- | --- | --- | --- |
| **I Perioperative neurocognitive function assessment and cognitive function exercise[2, 4-7]** (If you have another recommendation, please fill in the last part of this scale.) | | | | |
| **Cognitive function assessment:** Please select and recommend a scale for the four time points:preoperative, 7 days, 1 month, and 3 months postoperatively. The scale can be the same at different time points. If you have other recommended scales, please fill in the last part of this item. If you have another recommended time, please fill in the last part of this scale. | | | | |
| 1.The Mini-Cog scale (see Annex 1) |  |  |  |  |
| Time: preoperative, postoperative 7 days, 1 month, 3 months |  |  |  |  |
| Location: Bedside |  |  |  |  |
| 2.MMSE Scale (see Annex 2) |  |  |  |  |
| Time: preoperative, postoperative 7 days, 1 month, 3 months |  |  |  |  |
| Location: Bedside |  |  |  |  |
| 3.TICS-M (see Annex 3) |  |  |  |  |
| Time: 1 day before operation, 7 days after operation, 1 month, 3 months |  |  |  |  |
| Location: Bedside, Telephone |  |  |  |  |
|  |  |  |  |  |
| **Evaluation of postoperative delirium**:Please select and recommend a scale for the three time periods: before operation, 1-7 days after operation, and from 1 day after operation to discharge and anesthesia recovery room. The scale can be the same at different time points. If you have other recommended scales, please fill in the last part of this item. If you have another recommended time, please fill in the last part of this scale. | | | | |
| 1.3D-CAM (see Annex 4) |  |  |  |  |
| Time: Before and after surgery 1-7 days or 1 day after surgery to before discharge |  |  |  |  |
| Location: Bedside |  |  |  |  |
| 2.CAM (see Annex 4) |  |  |  |  |
| Time: Before and after surgery 1-7 days or 1 day after surgery to before discharge |  |  |  |  |
| Location: Bedside |  |  |  |  |
| 3.CAM-ICU (see Annex6)：POD assessment begins during recovery from anesthesia **[17][18]** |  |  |  |  |
| Time: Anesthesia resuscitation room |  |  |  |  |
| Location: Anesthesia resuscitation room |  |  |  |  |
|  |  |  |  |  |
| **Perioperative cognitive function exercise (including preoperative and postoperative)** | | | | |
| 1. Enhancing cognitive function **[21]:** Engaging in conversation with patients, encouraging them to read books, newspapers, or listen to the radio, etc. |  |  |  |  |
| 2. Assisting with orientation recovery **[21]:** Inform the patient of their location, the time, and their current condition; provide a clock, calendar, etc. |  |  |  |  |
| 3. For patients with visual impairment:**[16]：** |  |  |  |  |
| Use visual aids when fully conscious |  |  |  |  |
| Approach the patient from the side with better visibility. |  |  |  |  |
| 4. For individuals with hearing impairment **[16]** |  |  |  |  |
| Use hearing aids when awake |  |  |  |  |
| Wear your hearing aids and ensure they are functioning correctly. |  |  |  |  |
| Speak clearly and minimise background noise. |  |  |  |  |
| 5. Encourage patients to engage in cognitive-enhancing activities: attention training, working memory exercises, and habit-correction training. |  |  |  |  |
| **Postoperative delirium treatment** | | | | |
| 1. Non-pharmacological therapy |  |  |  |  |
| (1) Remove risk factors |  |  |  |  |
| For hypoxaemia: Promptly identify and assess hypoxaemia; monitor the patient's blood oxygen concentration, maintaining oxygen saturation above 90%. |  |  |  |  |
| For infections: Promptly identify and treat infections; avoid unnecessary intubation (e.g., urinary catheterisation); strictly implement hospital infection control measures. |  |  |  |  |
| For polypharmacy: Assess medications with the involvement of clinical pharmacists; Reduce the number of medications prescribed to patients; Avoid medications that exacerbate delirium symptoms. |  |  |  |  |
| Comprehensive preventive measures should be implemented to address patient risk factors. |  |  |  |  |
| (2) Change the environment and behavioral support |  |  |  |  |
| Patients exhibiting hazardous behaviour may be subject to appropriate behavioural restrictions or physical restraints. Timely assessment of cognitive function should be conducted, with restraints removed as soon as medically feasible. |  |  |  |  |
| Whenever possible, facilitate the patient's return to a familiar environment: introduce them to the surroundings and staff, provide care by familiar nursing personnel or family members, and encourage visits from the patient's relatives and friends. |  |  |  |  |
| Provide a well-lit environment with a large digital clock and a wall calendar |  |  |  |  |
| Music therapy, massage |  |  |  |  |
| Fostering wakefulness and activity to encourage a normal sleep-wake cycle |  |  |  |  |
|  |  |  |  |  |
| 2. Pharmacological treatment | | | | |
| Haloperidol |  |  |  |  |
| Risperidone |  |  |  |  |
| Olanzapine |  |  |  |  |
| Quetiapine |  |  |  |  |
| Dexmedetomidine |  |  |  |  |
| A psychiatrist for help. |  |  |  |  |
| **Intervention strategy** | **Recommended to retain** | **Importance index (1-5)** | **Suggest modification/addition** | **Specific changes** |
| **II Perioperative pain management with multi-modal analgesia[2, 8-10]** (If you have other recommendations, please fill them in the space below.) | | | | |
| **Preoperative Pain Management** |  |  |  |  |
| 1. Administer analgesics based on pain scores. |  |  |  |  |
| Nonsteroidal analgesics |  |  |  |  |
| opioid medications |  |  |  |  |
| 2. Regional anesthesia technique (See “Intraoperative Pain Management” Item 2) |  |  |  |  |
|  |  |  |  |  |
| **Intraoperative pain management** |  |  |  |  |
| 1. Opioid-based continuous analgesia. |  |  |  |  |
| 2. Regional anesthesia technique (Select two of the following five items. Please fill in only the two relevant items you recommend.) |  |  |  |  |
| (1) Epidural analgesia |  |  |  |  |
| Drug: Morphine |  |  |  |  |
| Drug: Hydromorphone |  |  |  |  |
| Drug: Ropivacaine |  |  |  |  |
| (2) Paravertebral Block |  |  |  |  |
| Drug: Ropivacaine |  |  |  |  |
| (3) Anterior serratus block |  |  |  |  |
| Drug: Ropivacaine |  |  |  |  |
| (4) Erector Spinae Blockade |  |  |  |  |
| Drug: Ropivacaine |  |  |  |  |
| (5) Intercostal Nerve Block |  |  |  |  |
| Other recommended methods |  |  |  |  |
|  |  |  |  |  |
| **Postoperative pain management** |  |  |  |  |
| 1. Patient-controlled intravenous analgesia |  |  |  |  |
| 2. Regional anesthesia technique (See “Intraoperative Pain Management” for details. Only the recommended opinion needs to be filled in for this item.) |  |  |  |  |
| 3. Non-steroidal anti-inflammatory drugs were used three days after surgery |  |  |  |  |
| For all postoperative pain management protocols, do you have a recommended combination approach? For example: patient-controlled intravenous analgesia (PCIA) + paravertebral/epidural analgesia + oral nonsteroidal anti-inflammatory drugs (NSAIDs) for three days postoperatively. If you have other suggestions, please include them in the revision comments. |  |  |  |  |
|  |  |  |  |  |
| **Pain assessment** (Assessments will be conducted at the bedside before surgery and 1-3 days post-surgery. Please recommend one assessment tool. For example, if you recommend the Numerical Rating Scale, only the first three rows of the table need to be completed.) | | | | |
| 1. Numerical Rating Scale (NRS) |  |  |  |  |
| Intervention is performed if NRS is greater than 4. |  |  |  |  |
| Or you may recommend intervention when the NRS score exceeds points. |  |  |  |  |
| 2. Visual Analogue Scale (VAS) |  |  |  |  |
| Intervention is performed if the VAS score is greater than 4. |  |  |  |  |
| Or you may recommend intervention when the VAS score exceeds points. |  |  |  |  |
| Remedial analgesia: Additional analgesic medication administered by the anaesthetist based on pain scores (medication selected individually according to the patient's condition). | | | | |
| 1. Dezocine |  |  |  |  |
| 2.Avoid using pethidine.[23] |  |  |  |  |
| Other medications (please list specifically) |  |  |  |  |
|  |  |  |  |  |
| **III Intraoperative Anaesthesia Management (If you have other recommendations, please list them at the end of the corresponding entry.)** | | | | |
| **Anesthesia mode selection(If you select recommendation “1”, only the first 3 lines need to be filled out.)[7, 11, 12]** | | | | |
| 1. Intravenous anesthesia |  |  |  |  |
| Propofol |  |  |  |  |
| Etomidate |  |  |  |  |
|  |  |  |  |  |
| 2. Inhalation anesthesia |  |  |  |  |
| Sevoflurane |  |  |  |  |
| Difluoromethane |  |  |  |  |
| Iflurane |  |  |  |  |
|  |  |  |  |  |
| 3. intravenous inhalational anesthesia |  |  |  |  |
| If you select this option, the recommended medication is: |  |  |  |  |
| **adjuvant drug[2, 4, 6, 7]** | | | | |
| 1. Avoid benzodiazepines. |  |  |  |  |
| 2. Avoid anticholinergic drugs. |  |  |  |  |
| 3. Use dexmedetomidine[10] |  |  |  |  |
| Continuous infusion of dexmedetomidine 0.5–1.0 μg/kg administered 10–15 minutes prior to anaesthetic induction. |  |  |  |  |
| During the maintenance phase of general anaesthesia, continuous infusion of dexmedetomidine at a rate of 0.2 to 0.7 μg·kg⁻¹·h⁻¹ may be administered. |  |  |  |  |
| Administering rocuronium should be discontinued at least 30 minutes to 1 hour before the conclusion of surgery. |  |  |  |  |
| 4. Use of Ustadine[7] |  |  |  |  |
| 5. Use of glucocorticoids[5] |  |  |  |  |
| Dexamethasone |  |  |  |  |
| Methylprednisolone |  |  |  |  |
| Other recommendations: |  |  |  |  |
| **Anaesthesia Management** |  |  |  |  |
| 1. Minimize anesthesia operation time |  |  |  |  |
| 2. The depth of anesthesia was monitored and regulated: Bispectral Index (BIS)[9] |  |  |  |  |
| 3. Maintain blood pressure fluctuation within baseline ±20%. (Perform invasive arterial blood pressure monitoring, or noninvasive blood pressure monitoring every 5 minutes)  Baseline[13]：On the day before surgery, the patient's blood pressure is measured twice while awake and without medication, and the average value is taken. |  |  |  |  |
| 4. Strictly adhere to transfusion indications, maintaining hemoglobin levels above 100 g/L whenever possible[7]. |  |  |  |  |
| 5. lung protective ventilation strategy (small tidal volumes, positive end-expiratory pressure, and lung recruitment manoeuvres)[14] |  |  |  |  |
| (1) Avoid hyperventilation (maintain end-expiratory CO2 at 35-45 mmHg) |  |  |  |  |
| (2) Monitor PaCO2 (by performing blood gas analysis) to avoid CO2 retention. |  |  |  |  |
| (3) Maintain the inspired oxygen concentration at 30%–40% whenever possible. |  |  |  |  |
| (3) Perioperative hypoxemia should be avoided (maintain SpO2, not less than 90%). |  |  |  |  |
| 6. Temperature protection：Try to maintain body temperature not lower than 36 Degree Celsius (use inflatable thermal blanket)[7, 8]. |  |  |  |  |
| 7. Maintain water, electrolyte, and acid-base balance |  |  |  |  |
|  |  |  |  |  |
| **Intervention strategy** | **Recommended to retain** | **Importance index (1-5)** | **Suggest modification/addition** | **Specific changes** |
| **IV Sleep Assessment and Sleep Disorder Intervention[14-16] (If you have other recommendations, please fill them in the space below.)** | | | | |
| **Psychological assessment and emotion management** |  |  |  |  |
| 1. Huaxi heart sunny index questionnaire was used before and after operation[17] (see Annex7) |  |  |  |  |
| 2.If the score is greater than 16, a professional mental health center physician will intervene |  |  |  |  |
| 3.Good preoperative communication |  |  |  |  |
| 4.Kinship escort |  |  |  |  |
|  |  |  |  |  |
| **Sleep quality assessment and Sleep-disorder intervention** |  |  |  |  |
| **1.Sleep quality assessment**：researchers will conduct assessments preoperatively and 1–3 days postoperatively. Please select one of the following two assessment scales to complete: |  |  |  |  |
| (1) Sleep quality is assessed using the Numerical Rating Scale (NRS), with scores ranging from 0 to 10. A score of 0 indicates the best possible sleep, while a score of 10 indicates complete insomnia. |  |  |  |  |
| (2) Pittsburgh Sleep Quality Index (PSQI) |  |  |  |  |
| **2. Sleep disorder intervention**: Intervention shall be implemented if the Numerical Rating Scale (NRS) or Pittsburgh Sleep Quality Index (PSQI) score exceeds 5 points. |  |  |  |  |
| You recommend intervention when the score exceeds points. |  |  |  |  |
| (1) Non-pharmaceutical intervention |  |  |  |  |
| Principles of psychological behavior intervention：Enhance psychological counselling and communication with patients; Improve the sleep environment (avoid conducting medical procedures during night-time rest periods; Adjust night-time medication administration to minimise sleep disruption; Reduce corridor noise during sleeping hours). |  |  |  |  |
| Aromatherapy Hypnosis |  |  |  |  |
| (2) Pharmaceutical intervention: The attending physician shall administer medication according to the actual circumstances. | | | | |
| Alprazolam |  |  |  |  |
| Eszopiclone |  |  |  |  |
| melatonin |  |  |  |  |
| physician-assisted |  |  |  |  |
|  |  |  |  |  |
| **Intervention strategy** | **Recommended to retain** | **Importance index (1-5)** | **Suggest modification/addition** | **Specific changes** |
| **V. Nutritional status assessment and support[2] (If you have other recommendations, please fill them in the space below.)** | | | | |
| **Nutritional assessment**：The Nutrition Risk Screening 2002 (NRS-2002) was used for assessment. |  |  |  |  |
| Should there be any other recommended scales, please specify them in detail: |  |  |  |  |
| **Nutritional support** |  |  |  |  |
| 1.Patients who were at risk of malnutrition or had suffered from preoperative malnutrition (NRS2002≥3 points) were adjusted to improve their nutritional status before surgery |  |  |  |  |
| 2. After the postoperative evaluation, if the NRS2002 score is ≥3, nutritional support should be provided, such as enteral nutrition support. If necessary, the nutrition department should provide professional nutritional support. |  |  |  |  |
|  |  |  |  |  |
| **Intervention strategy** | **Recommended to retain** | **Importance index (1-5)** | **Suggest modification/addition** | **Specific changes** |
| **VI. Anesthesia recovery period management[18]:** As this phase represents the transitional period between general anaesthesia and ward care, it is listed separately. |  |  |  |  |
| **Early removal of tracheal catheter** |  |  |  |  |
| **Timely pain assessment and management** |  |  |  |  |
| **Helps to restore orientation: Cognitive exercise began during the recovery period from anesthesia** |  |  |  |  |
|  |  |  |  |  |
| **Intervention strategy** | **Recommended to retain** | **Importance index (1-5)** | **Suggest modification/addition** | **Specific changes** |
| **VII. Intensive care unit interventions[16]** |  |  |  |  |
| **Active treatment of primary disease** |  |  |  |  |
| **Improve ICU environment and patient comfort**  By day and night light adjustment, reduce the noise in the ward, maintain a comfortable temperature |  |  |  |  |
| **Apply dexmedetomidine** |  |  |  |  |
| **ABCDE strategy**: Daily Awake, Breathing trial, Choice of appropriate sedative and analgesic medications, Delirium monitoring, and Early mobilization and mobilization Exercise |  |  |  |  |
| **VIII. Ward interventions[2]: Based on the HELP Programme** |  |  |  |  |
| **Early activities**: Walking; independent eating; self-care; preventing pressure sores |  |  |  |  |
| **Enhancing sensory stimulation**: Engaging in cognitive stimulation activities, providing spectacles, hearing aids, etc.; appropriate lighting; adjusting stimulation levels according to the patient's condition[19]. |  |  |  |  |
| **Improve fluid and nutrient intake**: Patients select their own food; Professional nutritional support. |  |  |  |  |
| **Improving sleep**: Adjusting the sleep cycle in consideration of the patient's own sleep habits. |  |  |  |  |
| **Cognitive training:** Targeted communication; provision of orientation aids such as clocks and calendars; small group discussions; reminiscence therapy; family education to assist patients with cognitive exercises[19]. |  |  |  |  |
| **Strengthen communication to enhance a sense of security**: Avoid unnecessary distractions. |  |  |  |  |
| **IX Interventions for enhanced recovery after surgery[2, 12, 20]** |  |  |  |  |
| **Early mobilisation** |  |  |  |  |
| **Early removal of tubes** (drainage tubes, urinary catheters, etc.) |  |  |  |  |
| **Restoration of intestinal function**: Early intake of fluids and food |  |  |  |  |
| **If you have any intervention strategies be added, please specify them in the detailed modification suggestions.** |  |  |  |  |

Reference

[1] Cui Y, Et Al. The effect of perioperative anesthetics for prevention of postoperative delirium on general anesthesia: A network meta-analysis [J]. J Clin Anesth, 2019, 59: 89-98.

[2] Chinese Society of Anesthesiology Anesthesia Aging G, Wang T, Wang D, Mei W E I, Ouyang W E N. Guidelines for Perioperative Anesthetic Management of Elderly Patients in China [J]. International Journal of Anesthesia and Resuscitation, 2014, 35(10): 870-881.

[3] Deiner S, Luo X, Lin H-M. Intraoperative Infusion of Dexmedetomidine for Prevention of Postoperative Delirium and Cognitive Dysfunction in Elderly Patients Undergoing Major Elective Noncardiac Surgery A Randomized Clinical Trial [J]. JAMA Surg, 2017, 152(8).

[4] Adults A G S E P O P D I O. American Geriatrics Society abstracted clinical practice guideline for postoperative delirium in older adults [J]. J Am Geriatr Soc, 2015, 63(1): 142-150.

[5] Qiao Y, Et Al. Postoperative cognitive dysfunction after inhalational anesthesia in elderly patients undergoing major surgery: the influence of anesthetic technique, cerebral injury and systemic inflammation [J]. BMC Anesthesiol, 2015, 15: 154.

[6] Wang D. Adult Postoperative Delirium Prevention and Treatment Expert Consensus [J]. International Journal of Anesthesiology and Resuscitation, 2014, 311.

[7] Chinese Society of Anesthesiology Anesthesia Aging G, National Center for Clinical Medicine Research on Aging D, Chinese Society Of P, National Center for Sleep R, National Anesthesia Aging A, Chinese Society of Cardiovascular Anesthesia Perioperative Organs Protection D. Chinese Multidisciplinary Expert Consensus on Perioperative Brain Health for Elderly Patients (II) [J]. Chinese Medical Journal, 2019, 29.

[8] Wei Y. Study on the Use of Inflatable Warming Blankets for Temperature Protection in Thoracic Surgery Patients [J]. Modern Chinese Drug Application, 2019, 13(2): 186-188.

[9] Xu T, Zhang X I N, Lin H U I, Ji X U E. Intraoperative BIS Monitoring Reduces Postoperative Delirium: Systematic Review and Meta-Analysis [J]. Anesthesia Safety and Quality Control, 2017, 1(04).

[10] Wu X, Xue Z, Ma H, Wang G. Expert Consensus on Clinical Application of Dexmedetomidine (2018) [J]. Clinical Anesthesia, 2018, 34(08): 820-823.

[11] Miller D, Et Al. Intravenous versus inhalational maintenance of anaesthesia for postoperative cognitive outcomes in elderly people undergoing non-cardiac surgery [J]. Cochrane Database Syst Rev, 2018, 8(CD012317).

[12] Chinese Society of Geriatric M. Chinese Expert Consensus on Prevention and Treatment of Postoperative Delirium in Elderly Patients [J]. Chinese Journal of Geriatrics, 2016, 35(12): 1257-1262.

[13] Hirsch J, Depalma G, Tsai T T, Sands L P, Leung J M. Impact of intraoperative hypotension and blood pressure fluctuations on early postoperative delirium after non-cardiac surgery [J]. Br J Anaesth, 2015, 115(3).

[14] Chinese Society of Anesthesiology Anesthesia Aging G, National Center for Clinical Medicine Research on Aging D, Chinese Society Of P, National Center for Sleep R, National Anesthesia Aging A, Chinese Society of Cardiovascular Anesthesia Perioperative Organs Protection D. Chinese Multidisciplinary Expert Consensus on Perioperative Brain Health for Elderly Patients (III) [J]. Chinese Medical Journal, 2019, 31.

[15] Wassenaar A, Van Den Boogaard M, Et Al. Determination of the feasibility of a multicomponent intervention program to prevent delirium in the Intensive Care Unit: A modified RAND Delphi study [J]. Aust Crit Care, 2017, 30(6).

[16] Tang B O, Wang X, Chen W. Expert Consensus on Delirium Management for Critically Ill Patients [J]. Chinese Journal of Internal Medicine, 2019, 58(2): 108-118.

[17] Wang J, Et Al. The development and validation of Huaxi emotional-distress index (HEI): A Chinese questionnaire for screening depression and anxiety in non-psychiatric clinical settings [J]. Compr Psychiatry, 2017, 76: 87-97.

[18] Aldecoa C, Bettelli G, Bilotta F, Et Al. European Society of Anaesthesiology evidence-based and consensus-based guideline on postoperative delirium [J]. Eur J Anaesthesiol, 2017, 34(4).

[19] Wang Y-Y, Yue J-R, Xie D-M, Et Al. Effect of the Tailored, Family-Involved Hospital Elder Life Program on Postoperative Delirium and Function in Older Adults: A Randomized Clinical Trial [J]. JAMA Intern Med, 2019, 179(6).

[20] Zhu M, Huang Y, Liu X. Expert Consensus on Perioperative Management of Elderly Patients at Peking Union Medical College Hospital [J]. Journal of Peking Union Medical College, 2018, 9(1): 36-41.

**Annex 1 Mini-Cog Scale**

| project | score | remark |
| --- | --- | --- |
| 1. memory  Now I'm going to name three words, and when I'm done, I want you to repeat them. Remember these three things, because you're going to be asked again in a few minutes. (Explain them carefully, one second for each thing. Give the subject three tries. If you can't repeat them exactly three times, move on to the next evaluation.) Banana, sunrise, chair.  Please describe these three things. | ☐Banana  ☐Sunrise  ☐Chair | This column is not graded. For the correct answer, fill in the "×" at the "☐" |
| 2. Draw a clock (watch)  Describe the problem in the following sentence order: Please draw a watch in the space below. First draw a big circle, fill in all the numbers on the clock, and then draw the clock hand to 11:10 (11:10) (If 3 minutes cannot be completed, proceed to the next evaluation) | ☐ 0 point: abnormal  ☐2 point: normal | A normal clock consists of the following elements:  1. There are all numbers 1-12, each appearing only once, arranged in the correct order and direction within the circle (numbers arranged clockwise);  2. Two pointers are drawn, one pointing to 11 and the other to 10.  An abnormal clock is missing any of the above elements; refusing to draw a clock is recorded as abnormal. |
| 3. memory  Now please name the things I told you to remember: banana, sunrise, chair, | ☐Banana  ☐Sunrise  ☐Chair | This column is not graded. For the correct answer, fill in the "×" at the "☐" |
| 4. memory  Banana, sunrise, chair, | ☐1 point  ☐2 point  ☐3 point | 1 point for each correct answer |
| Total score (>2 points: normal cognitive function)  ☐0 point ☐1point ☐2point ☐3point ☐4point ☐5point |  | Select the total score of item 2 and item 4 |

**Annex 2 MMSE (Mini-Mental State Examination)**

| **project** | | | **record** | | | **Score** | | |
| --- | --- | --- | --- | --- | --- | --- | --- | --- |
| **I directive force**  **(10 minutes total)** | **What day of** | **the week** |  | | | **0 1** | | |
| **day** |  | | | **0 1** | | |
| **month** |  | | | **0 1** | | |
| **season** |  | | | **0 1** | | |
| **year** |  | | | **0 1** | | |
| **where are we now** | **provinces and cities** |  | | | **0 1** | | |
| **District or county** |  | | | **0 1** | | |
| **Street or village** |  | | | **0 1** | | |
| **Place** |  | | | **0 1** | | |
| **What floor** |  | | | **0 1** | | |
| **II memory**  **(3 points in total: please say these three things again and score the first answer)** | **rubber ball** | |  | | | **0 1** | | |
| **national flag** | |  | | | **0 1** | | |
| **trees** | |  | | | **0 1** | | |
| **III Attention and calculation(Total 5 points: Please calculate 100 minus 7, then subtract 7 from the resulting number, and so on, please tell me the answer after each subtraction of 7 until I say "stop")** | **100-7（93）** | |  | | | **0 1** | | |
| **-7（86）** | |  | | | **0 1** | | |
| **-7（79）** | |  | | | **0 1** | | |
| **-7（72）** | |  | | | **0 1** | | |
| **-7（65）** | |  | | | **0 1** | | |
| **IV Memory**  **(Now, please name the three things I asked you to remember: "ball""flag""tree"** | **rubber ball** | |  | | | **0 1** | | |
| **national flag** | |  | | | **0 1** | | |
| **trees** | |  | | | **0 1** | | |
| **Vl anguage competence**  **(9 minutes total)** | **naming ability** | **(Shows watch) What's this thing called?** |  | **0 1** | | | | | |
| **(Shows pencil) What's this thing called?** |  | **0 1** | | | | | |
| **repetition ability** | **Now I want to say something, repeat after me clearly: "Forty-four stone lions."** |  | **0 1** | | | | | |
| **three-step command** | **I'll give you a piece of paper. Please do as I say. Now start: "Hold this paper in your right hand, fold it in two hands and place it on your lap."** |  | **3** | **2** | | **1** | **0** | |
| **reading ability** | **Please read this sentence and do as it says. Close your eyes** |  | **0 1** | | | | | |
|  | **writing ability** | **Please write me a complete sentence.** | **(Write down the full text of the sentence described.)** | **0 1** | | | | | |
| **structural capacity** | This is a picture. Please draw it on the same piece of paper. |  | **0 1** | | | | | |
| **total score** |  | |  |  | | | | | |

The scale consists of seven aspects: time orientation, place orientation, immediate memory, attention and calculation, delayed memory, language, and visual space. There are 30 items in total, and each item is worth 1 point for a correct answer and 0 points for an incorrect answer or no answer. The scale's total score ranges from 0 to 30 points. The test scores are closely related to the educational level. The standard normal cut-off values are: Literacy > 17 points, primary school > 20 points, junior high school and above > 24 points.

Scoring reference: Scores between 27 and 30: normal; Scores <27: cognitive impairment (21-26, mild;10-20, moderate;0-9, severe)

**Annex 3 TICS-M Telephone Interview for Cognitive Status - Modified**

| **project** | **remark** | **preoperative** | **7d after operation** | **1m after operation** | **3m after operation** |
| --- | --- | --- | --- | --- | --- |
| **1. may I have your name** | **2 point** |  |  |  |  |
| **2.What's the date today?**  **Including year, month, day, week and season** | **1 point for each item**  **Total 5** |  |  |  |  |
| **3.How old are you?**  **What's your home phone number?** | **1 point for each item**  **Total 2** |  |  |  |  |
| **4.Please count backwards from 20 to 1.** | **2 point** |  |  |  |  |
| **5.I'm going to read you ten words. Please listen carefully and try to remember them. But when I'm done, please try to recite them (out of order). Ready?**  **These words are: hut, pistol, elephant, arm, silk, cinema, watch, carriage, pillow, giant**  **Please remember, I'll ask you again later** | **1 point per word**  **Total 10** |  |  |  |  |
| **6.Subtract 7 from 100 to get the result and subtract 7 five times in a row** | **1 point each time**  **Total 5** |  |  |  |  |
| **7.What do people use to cut paper (scissors, knives)**  **How many months are there in a year (12)**  **What is the name of the prickly green plant in the desert (cactus/ball)**  **What animal does wool come from (sheep)** | **1 point each time**  **Total 4** |  |  |  |  |
| **8.Please follow me: 44 stone lions**  **Urumqi and Hohhot** | **1 point for each item**  **Total 4** |  |  |  |  |
| **9.Who is the current president of China**  **Who is the current Premier of China** | **2 point for each item**  **Total 4** |  |  |  |  |
| **10.Please tap the microphone of the telephone five times with your finger** | **2 point** |  |  |  |  |
| **11.I say a word, please say its antonym; example:**  **What is the opposite of hot (cold)?**  **What is the opposite of East (West)?** | **1 point for each item**  **Total 2** |  |  |  |  |
| **12.Do you remember the ten words I just said? Please try to recite them (out of order)** | **1 point per word**  **Total 2** |  |  |  |  |
| **☐≥32 point (Normal cognitive function)**  **☐≤27 point (Dementia)** | **total score** |  |  |  |  |

**Annex 4 3D-CAM ASSESSMENT**

| Computing Instructions –answer of abnormal includes – "I don't know", no response, or illogical response  For every abnormal response or 'yes' mark the un blackened square that notes the CAM feature exists | | | Features CAM | | | |
| --- | --- | --- | --- | --- | --- | --- |
| Say:" I have several questions regarding your thinking and memory" | | | 4 | 3 | 2 | 1 |
| 1. **1. Can you tell me what year it is** | □ abnormal | □normal |  |  |  |  |
| 1. **2. Can you tell me what day of the week it is?** | □ abnormal | □ normal |  |  |  |  |
| 1. **3. Can you tell me what type of building this is** | □ abnormal | □ normal |  |  |  |  |
| 1. **4. I am going to say a series of numbers, when I finish I want you to say them in reverse order, for instance I say 5-2 you respond 2_5, ok? The first series is** 7-5-1(1-5-7) | □ abnormal | □ normal |  |  |  |  |
| **5. The second is 8-2-4-3** )3-4-2-8) | □ abnormal | □ normal |  |  |  |  |
| 1. **6. Can you tell me the days of the week in reverse order, let's start from Saturday** One can give a hint by saying"what day comes before”, a hint may be given twice | □ abnormal | □ normal |  |  |  |  |
| 1. **7. Can you tell me the months of the year in reverse order' let's start with December** 2. One can give a hint "What month comes before", a hint may be given twice | □ ן abnormal | □ normal |  |  |  |  |
| 1. **8. Did you feel confused during this past day?** | □ yes | □ no |  |  |  |  |
| 1. 9. (If the answer to question 3 is abnormal, don't ask the following question and mark 'yes', if not ask) **During this past day' did you believe you were not hospitalized? *Should not skip if utilizing severity score** | □ yes | □ no |  |  |  |  |
| 1. **10. During the past day, did you see things that do not really exist?** | □ yes | □ no |  |  |  |  |
| Rating observations after asking questions 1-10 | | |  |  |  |  |
| 1. 11. Was the patient sleepy ,lethargic, or in a stupor during the interview | □ yes | □ no |  |  |  |  |
| 1. 12. Did the patient show excessive interest in everyday objects in his surroundings? (hypervigilance, inappropriately startled) | □ yes | □ no |  |  |  |  |
| 1. 13. Did the patient's speech show illogical or unclear flow of ideas , for example   Contradictory statements or shifting unpredictably from subject to subject. | □ yes | □ no |  |  |  |  |
| 1. 14. Is the patients conversation confused for example talking that is inappropriate, off target, or telling a story not related to interview? | □ yes | □ no |  |  |  |  |
| 1. 15. Is the patient's ability to converse abnormally limited or laconic? | □ yes | □ no |  |  |  |  |
| 1. 16. Did the patient have difficulty keeping track of what was being said during the interview? | □ yes | □ no |  |  |  |  |
| 1. 17. Was the patient distracted by stimuli in his environment in an inappropriate manner | □ yes | □ no |  |  |  |  |
| 18. Were there fluctuations in arousal levels of the patient during the interview, for example frequently falling asleep for part of the interview, but wide awake for part of the interview | □ yes | □ no |  |  |  |  |
| 1. 19. Were there fluctuations in attention levels during the interview, for example did the patient’s focus drastically change throughout the interview or change in performance during attention tasks | □ yes | □ no |  |  |  |  |
| 1. 20. Were there fluctuations in the patients speech /thinking, for example, initially spoke slowly and then quickened the pace dramatically? Coherent -> nonsensical | □ yes | □ no |  |  |  |  |
| Optional questions: To be asked only if feature #1 is not marked, #2 is marked , and 3 or 4 are marked | | |  |  |  |  |
| 1. 21. Contact family member, friend, caretaker or anyone familiar with the patient and ask, "Do you presently notice any acute changes in the mental status (memory/thinking) as opposed to the past? | □ yes | □ no |  |  |  |  |
| 22. In the case that at least 2 days passed since the hospitalization, and there exist results from prior CAM-3D: Check the previous results and evaluate if there has been significant change. One must determine if there has been an acute change in performance, based on ANY new "positive" items. | □ yes | □ no |  |  |  |  |
| Summary :Mark the number of features present in each column | | | 4 | 3 | 2 | 1 |
|  |  |  |  |
| **Diagnosis of delirium requires feature 1+2 in addition to either 3 OR 4: Present: ____________ Not present:________________** | | | | | | |
| Optional 3D-CAM-S score, classifying Delirium severity: Add 1 point for every item marked on left columns, from 1-20. If items 21-22 were addressed and the answers were "Yes", add one point to total score, so that the maximal score would be 20.  Delirium severity score 3D-CAM-S = /20 | | | | | | |

**Annex 5 Confusion Assessment Method，CAM**

| Characteristics | performance | Positive criteria |
| --- | --- | --- |
| 1.ACUTE ONSET AND FLUCTUATING COURSE | (1) Is there evidence of an acute change in mental status  from the patient’s baseline? | (1) or (2) any answer being ‘yes’ |
| (2)Did this behavior fluctuate  during the past day, that is, tend to come and go or  increase and decrease in severity? |
| 2.NATTENTION | Does the patient have difficulty focusing attention, for  example, being easily distractible, or having difficulty  keeping track of what was being said? | ‘yes’ |
| 3.DISORGANIZED THINKING | Is the patient’s speech disorganized or incoherent,  such as rambling or irrelevant conversation, unclear  or illogical flow of ideas, or unpredictable switching  from subject to subject? | ‘yes’ |
| 4.ALTERED LEVEL OF CONSCIOUSNESS | Overall, how would you rate this patient’s level of  consciousness? | Any anomaly exists |
| THE DIAGNOSIS OF DELIRIUM REQUIRES A PRESENT/ABNORMAL RATING FOR CRITERIA: (1) AND (2) AND EITHER (3 OR 4) | | |

**Annex 6 The Confusion Assessment Method for the ICU (CAM-ICU)**


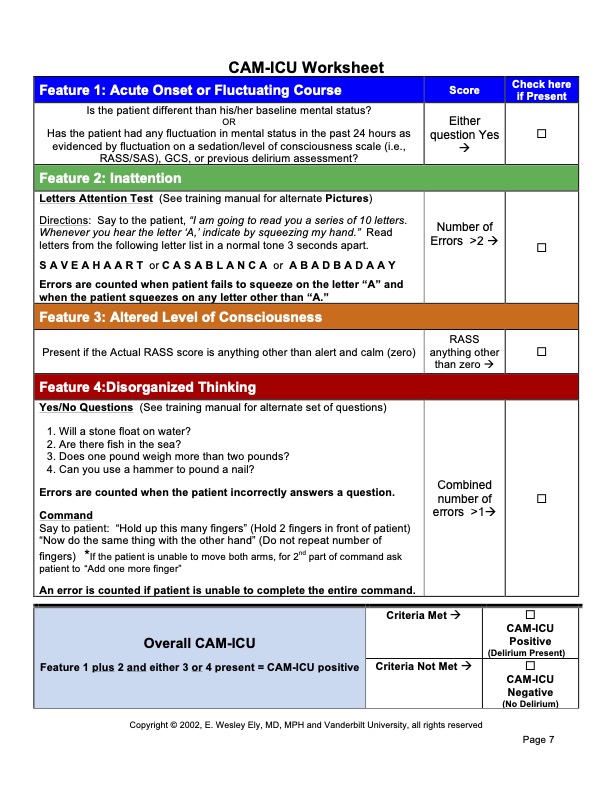


**Annex 7 Huaxi emotional-distress index（HEI）**

The Huaxi emotional-distress index comprises 11 items, with a maximum score of 36. All patients must complete items 1-9. If the total score for the first 9 items exceeds 8 points, items 10 and 11 are assessed; otherwise, the evaluation concludes.

HEI Scoring Criteria: The first nine questions of the HEI scale are scored from 0 to 4 points based on frequency of occurrence: ‘Not at all’, 'Occasionally', ‘Some of the time’, ‘Most of the time’, and ‘All of the time’. The total score for these nine questions is 36 points, with higher scores indicating more severe negative emotions. The grading criteria are as follows:

Grade 1: 0–8 points, no negative emotions;

Level 2: 9–12 points, mild negative emotions;

Level 3: 13–16 points, moderate negative emotions;

Level 4: 17–36 points, severe negative emotions.

Table 2 **Huaxi emotional-distress index**

| Items |
| --- |
| 1. How often do you feel so low that nothing can cheer you up?  2. How often do you feel no interest in anything?  3. How often do you feel overly tense?  4. How often do you feel uncontrollably worried or anxious?  5. How often do you feel restless to the point of being unable to calm down?  6. How often do you fear the sudden recurrence of severe fear or panic?  7. How often do you blame yourself?  8. How often do you feel hopeless?  9. How often do you feel life is meaningless?  10. How significantly do these negative emotions impact your daily life?  11. What are the causes of the various emotions described above? |

Note: All patients must complete questions 1 to 9. The first nine questions each offer five response options: A. Not at all B. Occasionally C. Some of the time D. Most of the time E. All of the time, assigned scores, B. Relationship/marital/family issues, C. Work or academic issues, D. Strained interpersonal relationships,ns 10 and 11; otherwise, assessment concludes. Question 10 assesses the impact of negative emotions on daily life: A. No impact B. Minimal impact C. Some impact D. Significant impact E. Major impact. Question 11 assesses the cause of negative emotions: A. Physical health issues B. Relationship/marital/family issues C. Work or academic issues D. Strained interpersonal relationships E. Other.
